# Supplementary material for: Virtual Reality-Based Immersive Rehabilitation for Cognitive- and Behavioral-Impairment-Related Eating Disorders: A VREHAB Framework Scoping Review
Source: MDPI journal article supplement (doi:10.3390/ijerph19105821), 2022-05-10
Supplement: s1 [file s1]

Supplementary Table S1: Search Strategy in Literature Review

| Database         | Field                             | Filter                             | Search Terms                                                                                                                                                                                                                                                                                                                                                                                                                                                                                                                                                                                                                                                                                                                                                                                                                                                                                                                                                                                                                                                                                                                                                                                                                                                                                                                                                                                                                                                                                                                                                                                                                                                                                                                                                                                                                                                                                                                                                                                                                                                                                                                                                                                                                                                                                                                                                                                                                                                                                                                                                                                                                                                                                                                                    |
|------------------|-----------------------------------|------------------------------------|-------------------------------------------------------------------------------------------------------------------------------------------------------------------------------------------------------------------------------------------------------------------------------------------------------------------------------------------------------------------------------------------------------------------------------------------------------------------------------------------------------------------------------------------------------------------------------------------------------------------------------------------------------------------------------------------------------------------------------------------------------------------------------------------------------------------------------------------------------------------------------------------------------------------------------------------------------------------------------------------------------------------------------------------------------------------------------------------------------------------------------------------------------------------------------------------------------------------------------------------------------------------------------------------------------------------------------------------------------------------------------------------------------------------------------------------------------------------------------------------------------------------------------------------------------------------------------------------------------------------------------------------------------------------------------------------------------------------------------------------------------------------------------------------------------------------------------------------------------------------------------------------------------------------------------------------------------------------------------------------------------------------------------------------------------------------------------------------------------------------------------------------------------------------------------------------------------------------------------------------------------------------------------------------------------------------------------------------------------------------------------------------------------------------------------------------------------------------------------------------------------------------------------------------------------------------------------------------------------------------------------------------------------------------------------------------------------------------------------------------------|
| Web of Science   | Topic                             | Type: Article<br>Language: English | (("deglutition disorders" OR "Deglutition Disorder" OR "Disorders, Deglutition" OR "Swallowing Disorders" OR "Swallowing Disorder" OR "Dysphagia" OR "Oropharyngeal Dysphagia" OR "Dysphagia, Oropharyngeal" OR "Esophageal Dysphagia" OR "Dysphagia, Esophageal" OR "malnutrition" OR "Nutritional Deficiency" OR "Nutritional Deficiencies" OR "Undernutrition" OR "Malnourishment" OR "Malnourishments" OR "Malnutrition, Protein-Energy" OR "Malnutritions, Protein-Energy" OR "Protein Energy Malnutrition" OR "Protein-Calorie Malnutrition" OR "Malnutrition, Protein-Calorie" OR "Protein Calorie Malnutrition" OR "Marasmus" OR "Acute Malnutrition, Severe" OR "Malnutrition, Severe Acute" OR "feeding and eating disorders" OR "Eating AND Feeding Disorders" OR "Feeding Disorders" OR "Disorder, Feeding" OR "Disorders, Feeding" OR "Feeding Disorder" OR "Eating Disorders" OR "Disorder, Eating" OR "Disorders, Eating" OR "Eating Disorder" OR "Appetite Disorders" OR "Appetite Disorder" OR "Anorexia Nervosa" OR "Avoidant Restrictive Food Intake Disorder" OR "Binge-Eating Disorder" OR "Bulimia Nervosa" OR "Diabulimia" OR "Feeding AND Eating Disorders of Childhood" OR "Food Addiction" OR "Night Eating Syndrome" OR "Orthorexia Nervosa" OR "Pica" OR "Relative Energy Deficiency in Sport" OR "Female Athlete Triad Syndrome" OR "Rumination Syndrome") OR ("Dementia" OR "Dementias" OR "Amentia" OR "Amentias" OR "Senile Paranoid Dementia" OR "Dementias, Senile Paranoid" OR "Paranoid Dementia, Senile" OR "Paranoid Dementias, Senile" OR "Senile Paranoid Dementias" OR "Familial Dementia" OR "Dementia, Familial" OR "Dementias, Familial" OR "Familial Dementias" OR "Stroke" OR "Strokes" OR "Cerebrovascular Accident" OR "Cerebrovascular Accidents" OR "CVA (Cerebrovascular Accident)" OR "CVAs (Cerebrovascular Accident)" OR "Cerebrovascular Apoplexy" OR "Apoplexy, Cerebrovascular" OR "Vascular Accident, Brain" OR "Brain Vascular Accident" OR "Brain Vascular Accidents" OR "Vascular Accidents, Brain" OR "Cerebrovascular Stroke" OR "Cerebrovascular Strokes" OR "Stroke, Cerebrovascular" OR "Strokes, Cerebrovascular" OR "Apoplexy" OR "Cerebral Stroke" OR "Cerebral Strokes" OR "Stroke, Cerebral" OR "Strokes, Cerebral" OR "Stroke, Acute" OR "Acute Stroke" OR "Acute Strokes" OR "Strokes, Acute" OR "Cerebrovascular Accident, Acute" OR "Acute Cerebrovascular Accident" OR "Acute Cerebrovascular Accidents" OR "Cerebrovascular Accidents, Acute" OR "cogniti*") AND ("eat*" OR "chew*" OR "swallow*")))) AND ("virtual reality" OR "virtual healthcare" OR "virtual visit" OR "immersive reality" OR "immersion" OR "haptic") AND ("rehab*" OR "train*" OR "therapy") |
| Scopus           | Article Title, Abstract, Keywords | Type: Article<br>Language: English |                                                                                                                                                                                                                                                                                                                                                                                                                                                                                                                                                                                                                                                                                                                                                                                                                                                                                                                                                                                                                                                                                                                                                                                                                                                                                                                                                                                                                                                                                                                                                                                                                                                                                                                                                                                                                                                                                                                                                                                                                                                                                                                                                                                                                                                                                                                                                                                                                                                                                                                                                                                                                                                                                                                                                 |
| EMBASE           | Abstract, Author keywords         | Type: Article                      |                                                                                                                                                                                                                                                                                                                                                                                                                                                                                                                                                                                                                                                                                                                                                                                                                                                                                                                                                                                                                                                                                                                                                                                                                                                                                                                                                                                                                                                                                                                                                                                                                                                                                                                                                                                                                                                                                                                                                                                                                                                                                                                                                                                                                                                                                                                                                                                                                                                                                                                                                                                                                                                                                                                                                 |
| CINAHL           | /                                 | Language: English                  |                                                                                                                                                                                                                                                                                                                                                                                                                                                                                                                                                                                                                                                                                                                                                                                                                                                                                                                                                                                                                                                                                                                                                                                                                                                                                                                                                                                                                                                                                                                                                                                                                                                                                                                                                                                                                                                                                                                                                                                                                                                                                                                                                                                                                                                                                                                                                                                                                                                                                                                                                                                                                                                                                                                                                 |
| Cochrane Library | Keyword                           | /                                  |                                                                                                                                                                                                                                                                                                                                                                                                                                                                                                                                                                                                                                                                                                                                                                                                                                                                                                                                                                                                                                                                                                                                                                                                                                                                                                                                                                                                                                                                                                                                                                                                                                                                                                                                                                                                                                                                                                                                                                                                                                                                                                                                                                                                                                                                                                                                                                                                                                                                                                                                                                                                                                                                                                                                                 |

| Database | Field | Filter               | Search Terms                                                                                                                                                                                                                                                                                                                                                                                                                                                                                                                                                                                                                                                                                                                                                                                                                                                                                                                                                                                                                                                                                                                                                                                                                                                                                                                                                                                                                                                                                                                                                                                                                                                                                                                                                                                                                                                                                                                                                                                                                                                                                                                                                                                                                                                                                                                                                                                                                                                                                                                                                                                                                                                                                                                                                                                                                                                                                                                                                                                                                                                                                                                                                                                                                                                                                                                                                                                                                                                                                                                                                                                                                                                                                                                                                                                                                                                                                                                                                                                                                                                                                                                                                                                                                     |
|----------|-------|----------------------|----------------------------------------------------------------------------------------------------------------------------------------------------------------------------------------------------------------------------------------------------------------------------------------------------------------------------------------------------------------------------------------------------------------------------------------------------------------------------------------------------------------------------------------------------------------------------------------------------------------------------------------------------------------------------------------------------------------------------------------------------------------------------------------------------------------------------------------------------------------------------------------------------------------------------------------------------------------------------------------------------------------------------------------------------------------------------------------------------------------------------------------------------------------------------------------------------------------------------------------------------------------------------------------------------------------------------------------------------------------------------------------------------------------------------------------------------------------------------------------------------------------------------------------------------------------------------------------------------------------------------------------------------------------------------------------------------------------------------------------------------------------------------------------------------------------------------------------------------------------------------------------------------------------------------------------------------------------------------------------------------------------------------------------------------------------------------------------------------------------------------------------------------------------------------------------------------------------------------------------------------------------------------------------------------------------------------------------------------------------------------------------------------------------------------------------------------------------------------------------------------------------------------------------------------------------------------------------------------------------------------------------------------------------------------------------------------------------------------------------------------------------------------------------------------------------------------------------------------------------------------------------------------------------------------------------------------------------------------------------------------------------------------------------------------------------------------------------------------------------------------------------------------------------------------------------------------------------------------------------------------------------------------------------------------------------------------------------------------------------------------------------------------------------------------------------------------------------------------------------------------------------------------------------------------------------------------------------------------------------------------------------------------------------------------------------------------------------------------------------------------------------------------------------------------------------------------------------------------------------------------------------------------------------------------------------------------------------------------------------------------------------------------------------------------------------------------------------------------------------------------------------------------------------------------------------------------------------------------------|
| PubMed   | /     | Language:<br>English | ("deglutition disorders"[Title/Abstract] OR "Deglutition Disorder"[Title/Abstract] OR "Disorders, Deglutition"[Title/Abstract] OR<br>"Swallowing Disorders"[Title/Abstract] OR "Swallowing Disorder"[Title/Abstract] OR "Dysphagia"[Title/Abstract] OR<br>"Oropharyngeal Dysphagia"[Title/Abstract] OR "Dysphagia, Oropharyngeal"[Title/Abstract] OR "Esophageal<br>Dysphagia"[Title/Abstract] OR "Dysphagia, Esophageal"[Title/Abstract] OR "malnutrition"[Title/Abstract] OR "Nutritional<br>Deficiency"[Title/Abstract] OR "Nutritional Deficiencies"[Title/Abstract] OR "Undernutrition"[Title/Abstract] OR<br>"Malnourishment"[Title/Abstract] OR "Malnourishments"[Title/Abstract] OR "Malnutrition, Protein-Energy"[Title/Abstract] OR<br>"Malnutritions, Protein-Energy"[Title/Abstract] OR "Protein Energy Malnutrition"[Title/Abstract] OR "Protein-Calorie<br>Malnutrition"[Title/Abstract] OR "Malnutrition, Protein-Calorie"[Title/Abstract] OR "Protein Calorie Malnutrition"[Title/Abstract]<br>OR "Marasmus"[Title/Abstract] OR "Acute Malnutrition, Severe"[Title/Abstract] OR "Malnutrition, Severe Acute"[Title/Abstract]<br>OR "feeding and eating disorders"[Title/Abstract] OR "Eating[Title/Abstract] AND Feeding Disorders"[Title/Abstract] OR "Feeding<br>Disorders"[Title/Abstract] OR "Disorder, Feeding"[Title/Abstract] OR "Disorders, Feeding"[Title/Abstract] OR "Feeding<br>Disorder"[Title/Abstract] OR "Eating Disorders"[Title/Abstract] OR "Disorder, Eating"[Title/Abstract] OR "Disorders,<br>Eating"[Title/Abstract] OR "Eating Disorder"[Title/Abstract] OR "Appetite Disorders"[Title/Abstract] OR "Appetite<br>Disorder"[Title/Abstract] OR "Anorexia Nervosa"[Title/Abstract] OR "Avoidant Restrictive Food Intake Disorder"[Title/Abstract]<br>OR "Binge-Eating Disorder"[Title/Abstract] OR "Bulimia Nervosa"[Title/Abstract] OR "Diabulimia"[Title/Abstract] OR<br>"Feeding[Title/Abstract] AND Eating Disorders of Childhood"[Title/Abstract] OR "Food Addiction"[Title/Abstract] OR "Night<br>Eating Syndrome"[Title/Abstract] OR "Orthorexia Nervosa"[Title/Abstract] OR "Pica"[Title/Abstract] OR "Relative Energy<br>Deficiency in Sport"[Title/Abstract] OR "Female Athlete Triad Syndrome"[Title/Abstract] OR "Rumination<br>Syndrome"[Title/Abstract]) OR (("Dementia"[Title/Abstract] OR "Dementias"[Title/Abstract] OR "Amentia"[Title/Abstract] OR<br>"Amentias"[Title/Abstract] OR "Senile Paranoid Dementia"[Title/Abstract] OR "Dementias, Senile Paranoid"[Title/Abstract] OR<br>"Paranoid Dementia, Senile"[Title/Abstract] OR "Paranoid Dementias, Senile"[Title/Abstract] OR "Senile Paranoid<br>Dementias"[Title/Abstract] OR "Familial Dementia"[Title/Abstract] OR "Dementia, Familial"[Title/Abstract] OR "Dementias,<br>Familial"[Title/Abstract] OR "Familial Dementias"[Title/Abstract] OR "Stroke"[Title/Abstract] OR "Strokes" OR "Cerebrovascular<br>Accident" OR "Cerebrovascular Accidents" OR "CVA (Cerebrovascular Accident)" OR "CVAs (Cerebrovascular<br>Accident)"[Title/Abstract] OR "Cerebrovascular Apoplexy"[Title/Abstract] OR "Apoplexy, Cerebrovascular"[Title/Abstract] OR<br>"Vascular Accident, Brain" OR "Brain Vascular Accident" OR "Brain Vascular Accidents" OR "Vascular Accidents, Brain" OR<br>"Cerebrovascular Stroke" OR "Cerebrovascular Strokes" OR "Stroke, Cerebrovascular" OR "Strokes, Cerebrovascular" OR<br>"Apoplexy" OR "Cerebral Stroke" OR "Cerebral Strokes" OR "Stroke, Cerebral" OR "Strokes, Cerebral" OR "Stroke, Acute" OR<br>"Acute Stroke" OR "Acute Strokes" OR "Strokes, Acute" OR "Cerebrovascular Accident, Acute" OR "Acute Cerebrovascular<br>Accident" OR "Acute Cerebrovascular Accidents" OR "Cerebrovascular Accidents, Acute"[Title/Abstract] OR<br>"cogniti*"[Title/Abstract]) AND ("eat*"[Title/Abstract] OR "chew*"[Title/Abstract] OR "swallow*"[Title/Abstract])) AND ("virtual<br>reality"[Title/Abstract] OR "virtual healthcare"[Title/Abstract] OR "virtual visit"[Title/Abstract] OR "immersive<br>reality"[Title/Abstract] OR "immersion"[Title/Abstract] OR "haptic"[Title/Abstract]) AND ("rehab*"[Title/Abstract] OR<br>"train*"[Title/Abstract] OR "therapy"[Title/Abstract]) |
